# Supplementary material for: The local and systemic response to SARS-CoV-2 infection in children and adults
Source: bioRxiv or medRxiv preprint supplement (doi:10.1101/2021.03.09.21253012), 2021-03-15
Supplement: Supplementary file [file media-1.pdf]

Extended Data Figure 1

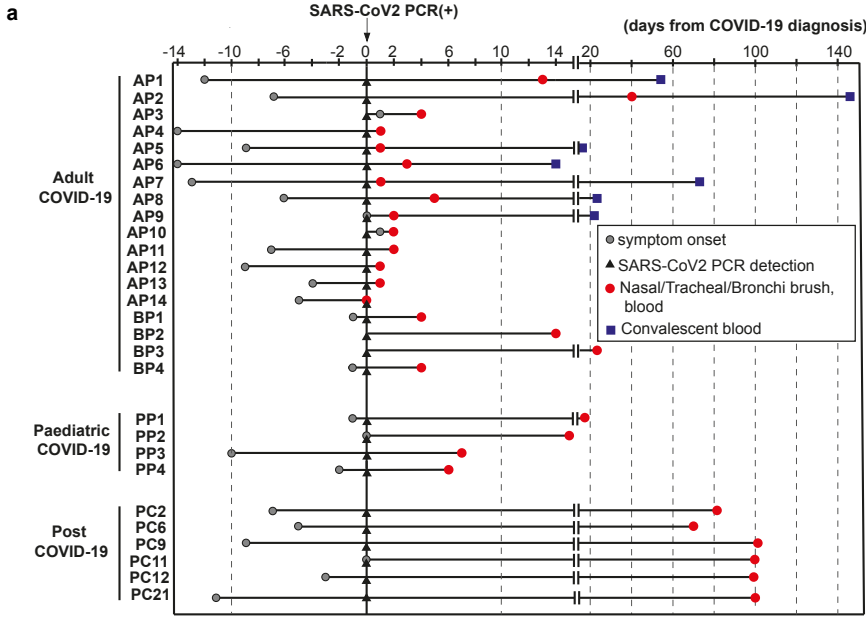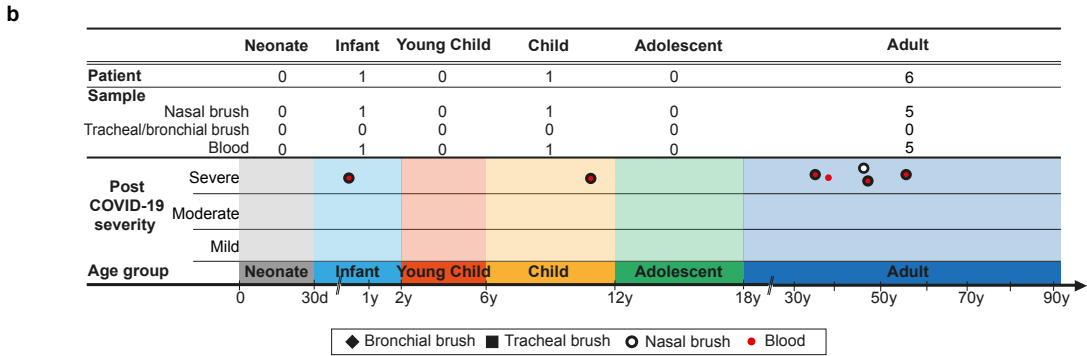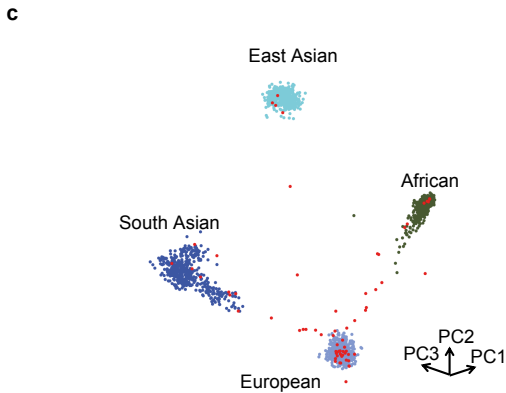

# Extended Data Figure 2

**a**

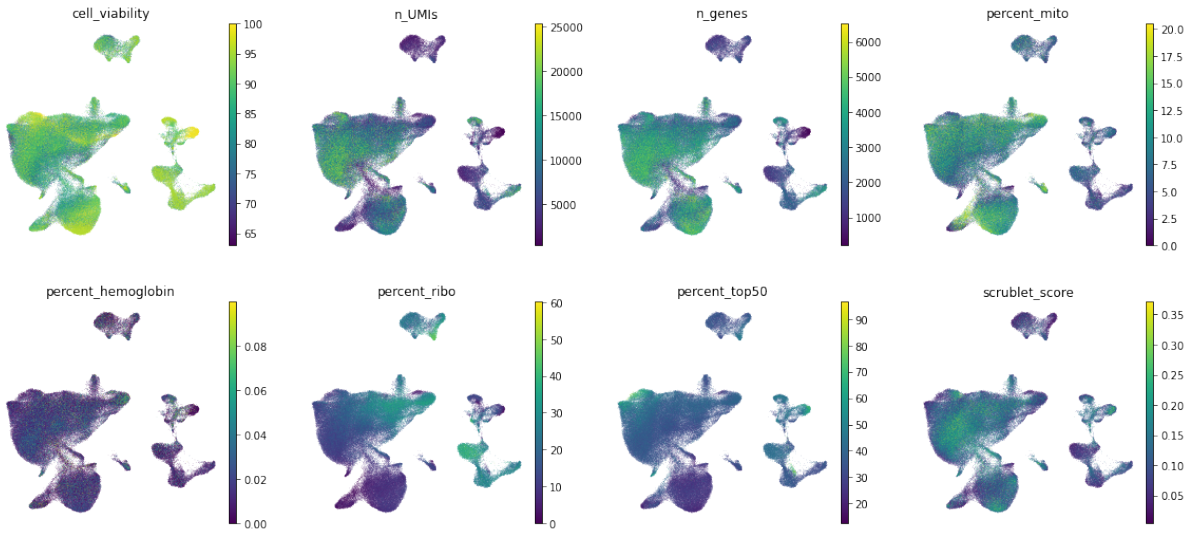

**b**

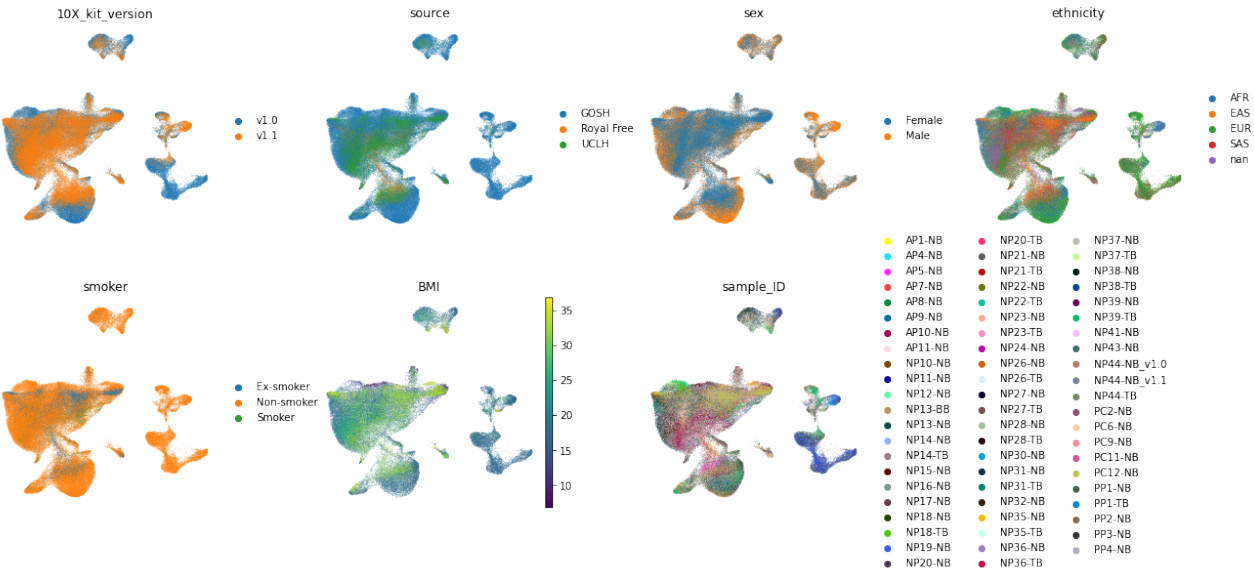

**c**

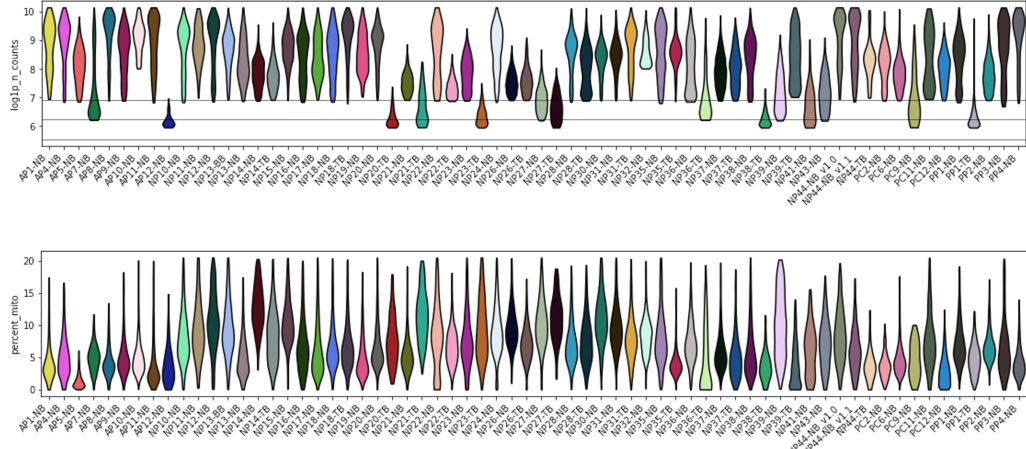

# Extended Data Figure 3

**a**

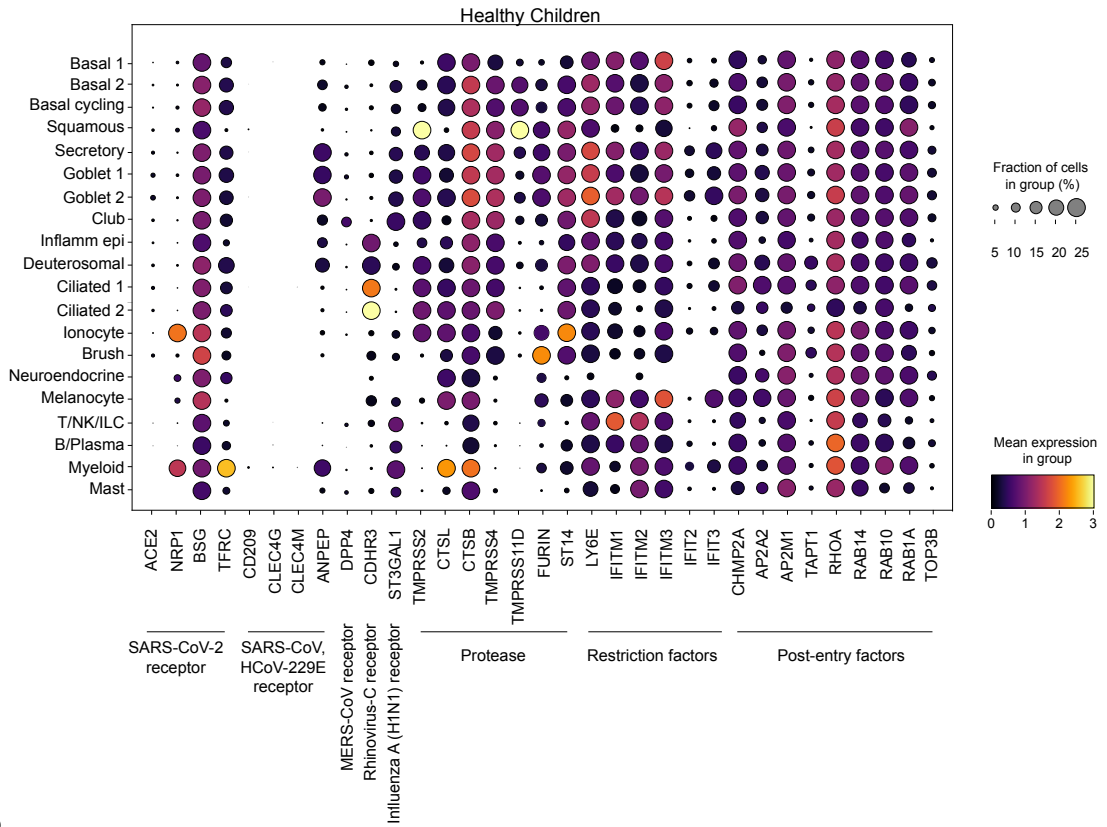

**b**

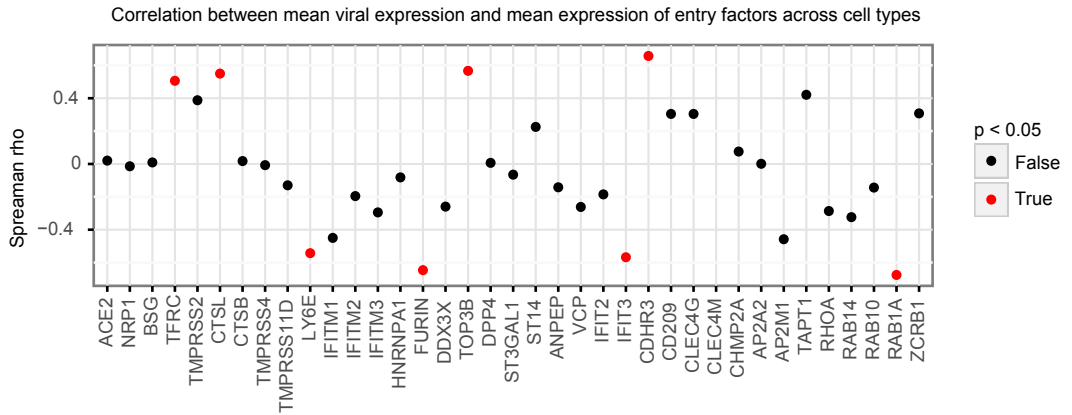

**c**

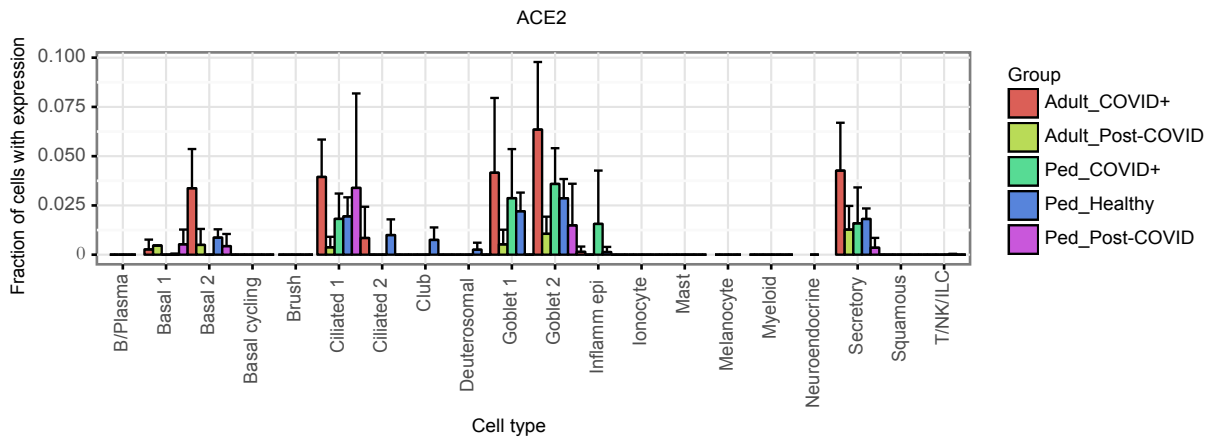

# Extended Data Figure 4

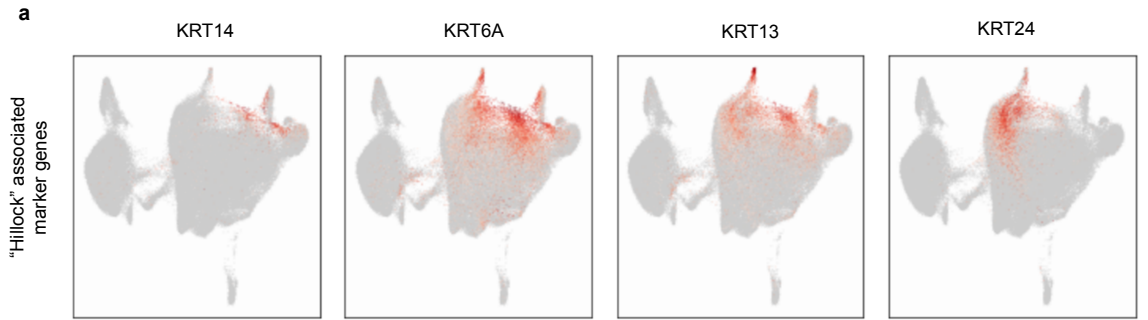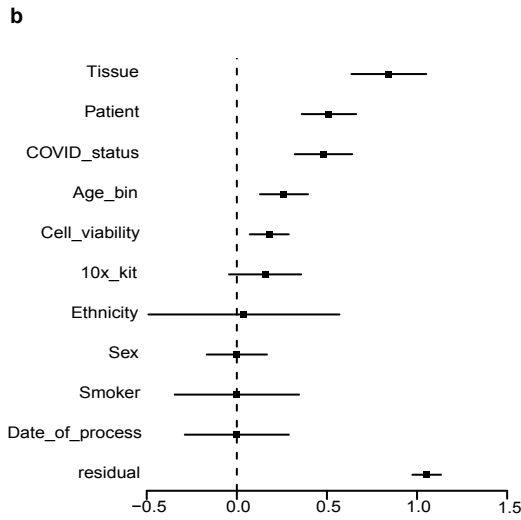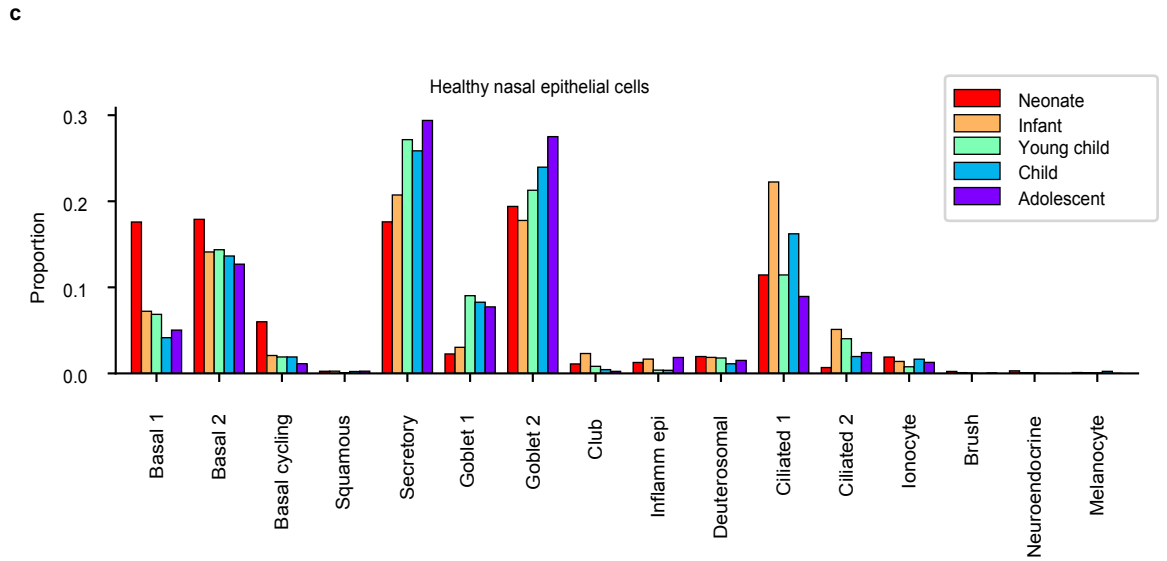

# Extended Data Figure 5

Expression signature scoring of cellular response to interferon

**a**

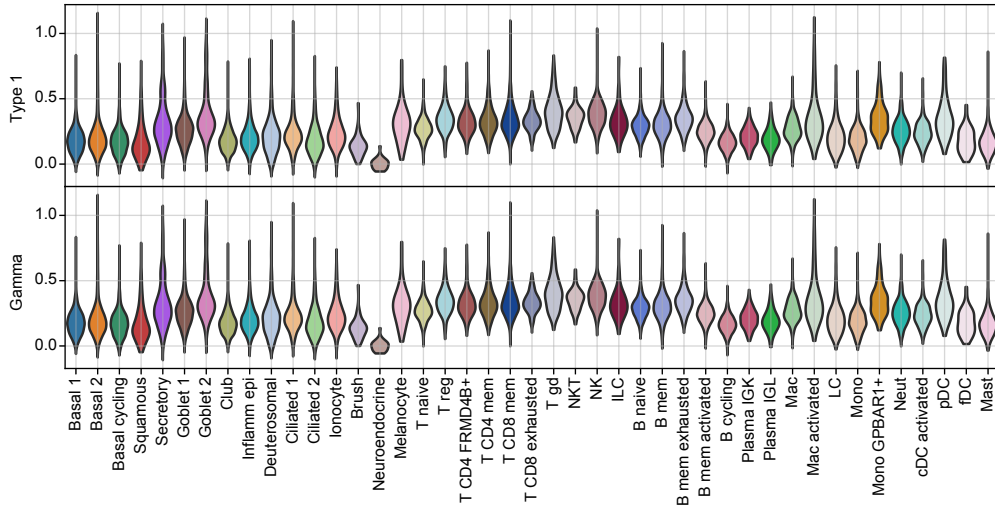

**b**

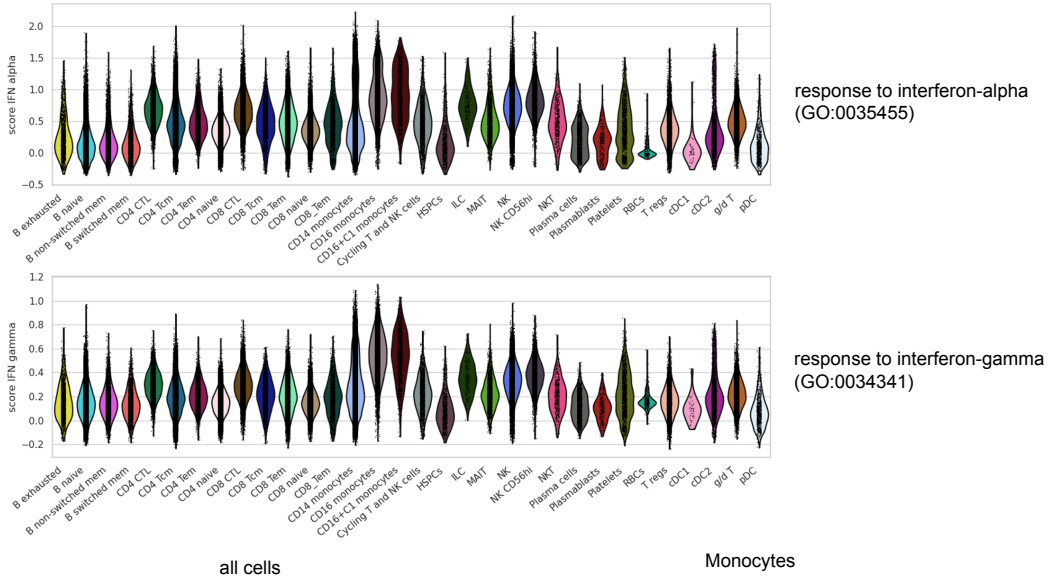

**c**

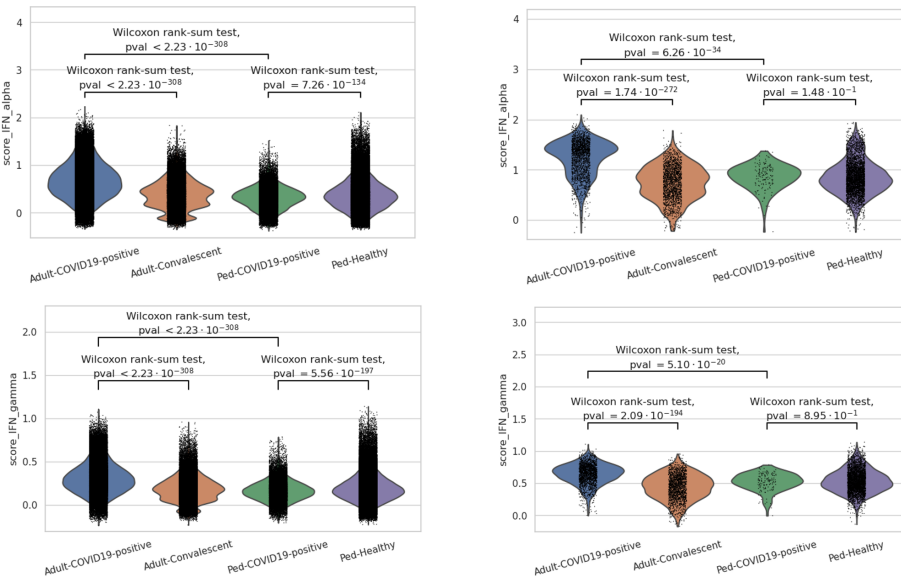

# Extended Data Figure 6

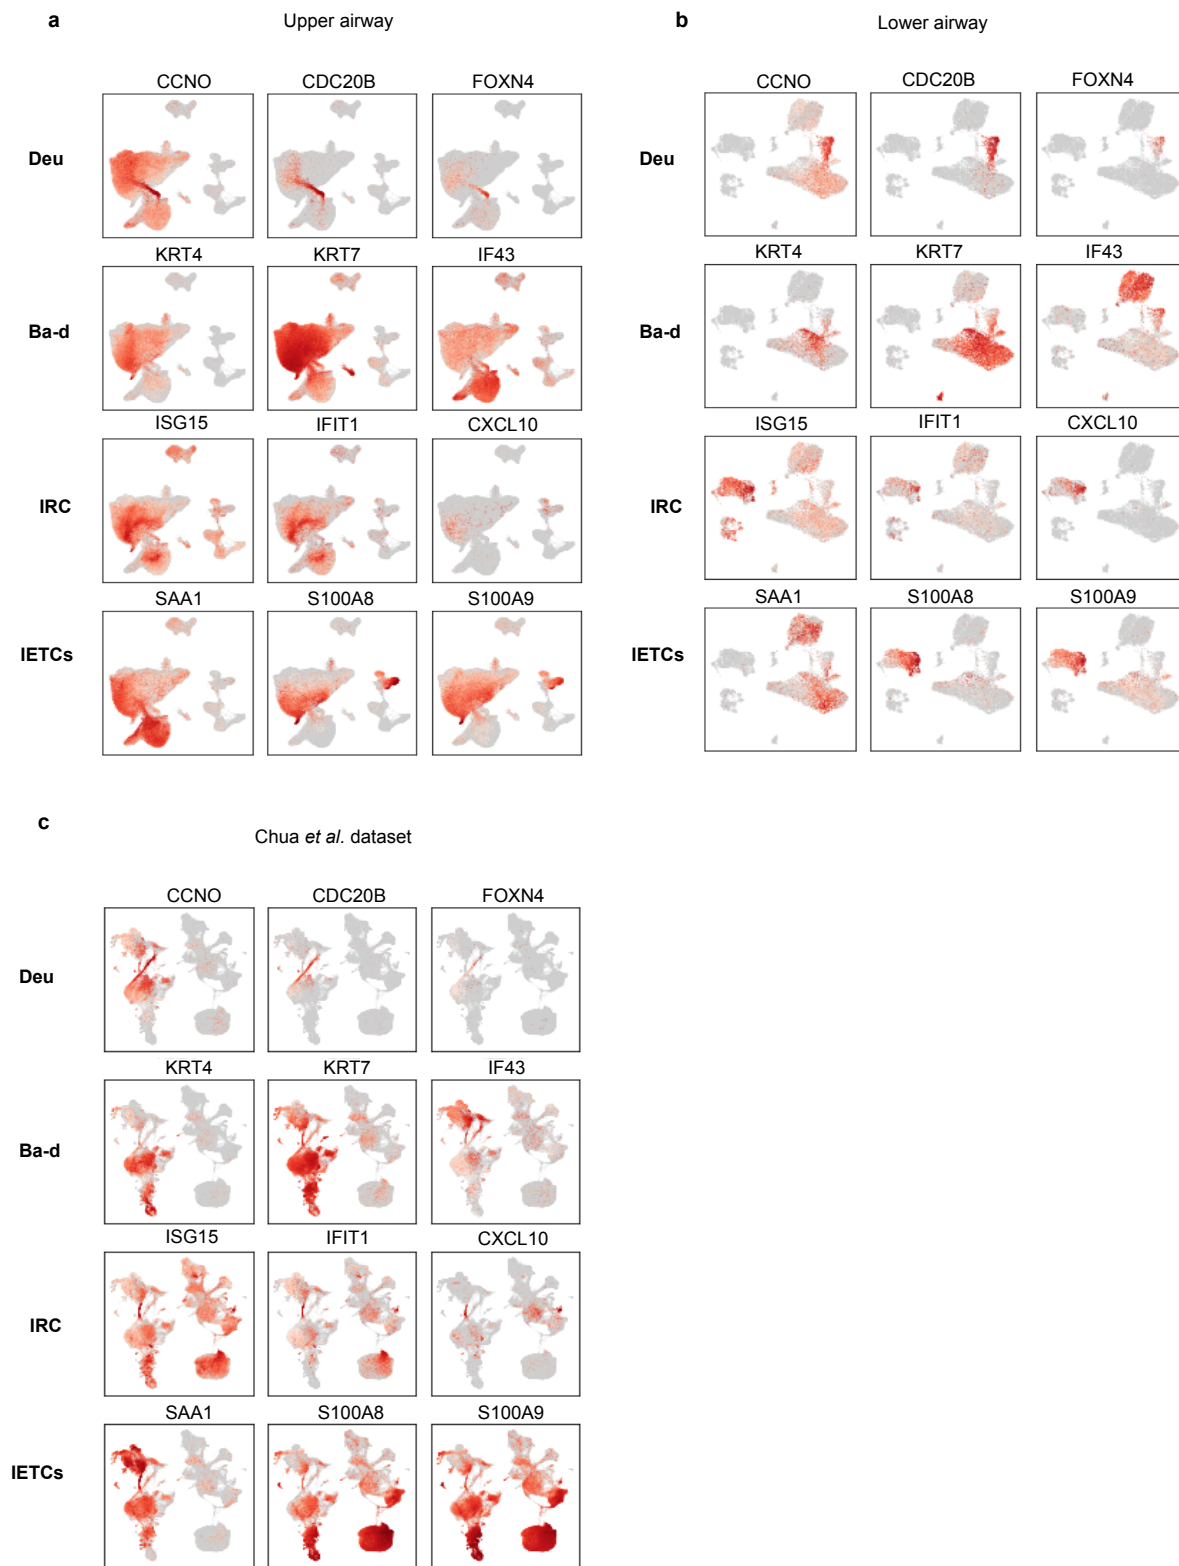

# Extended Data Figure 7

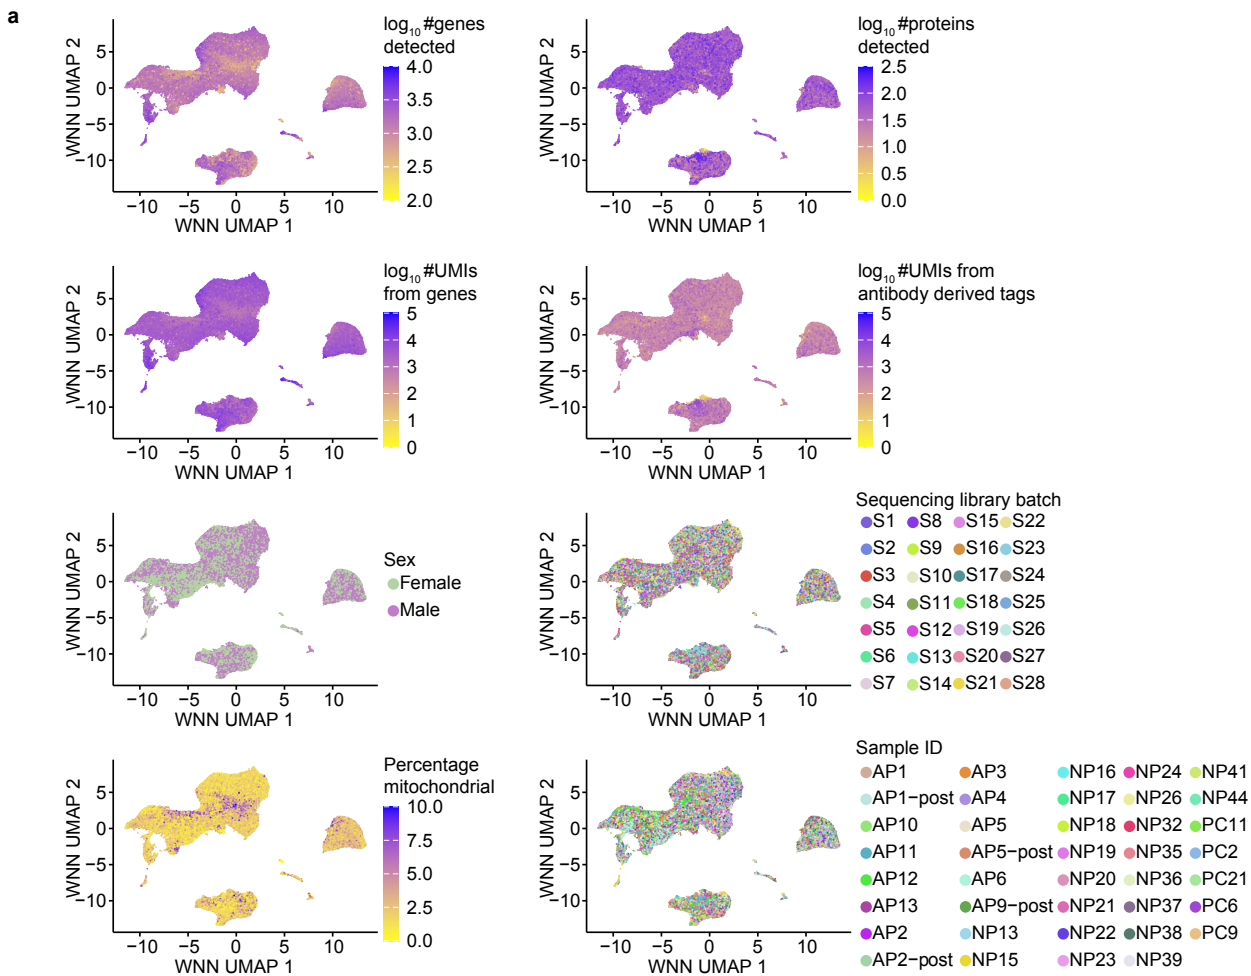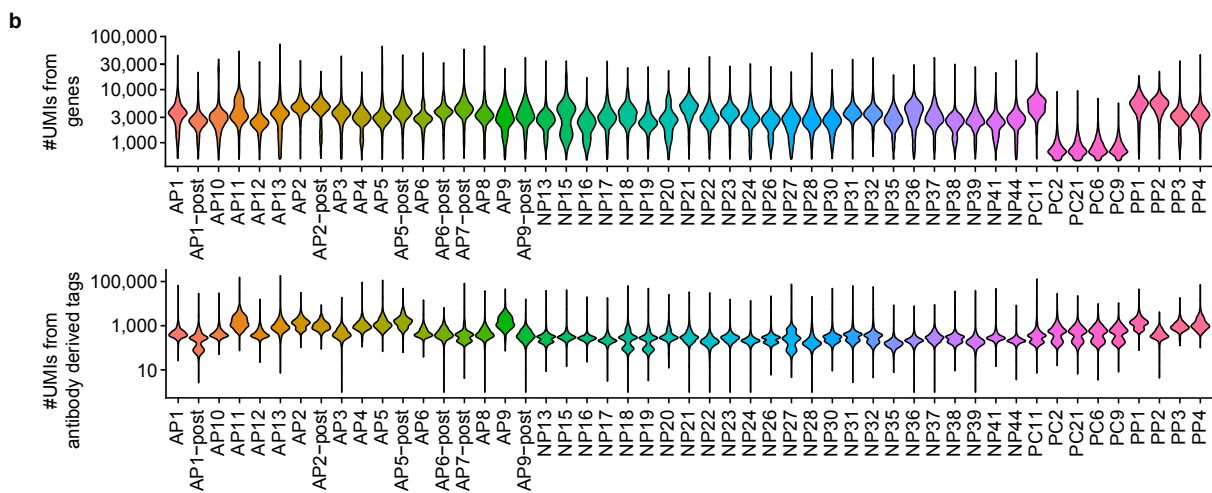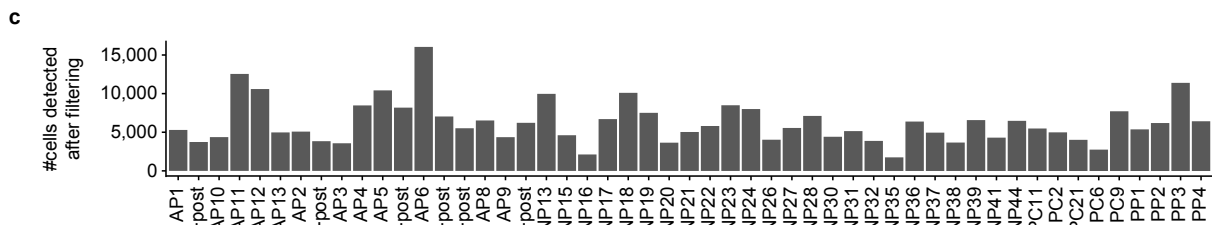

# Extended Data Figure 8

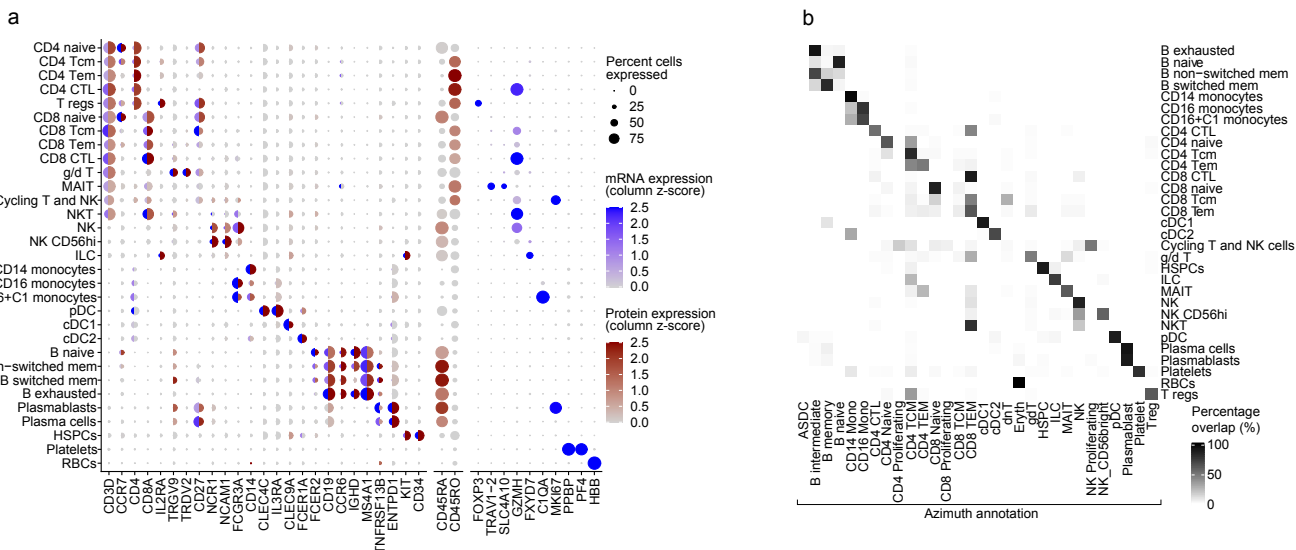

B naive

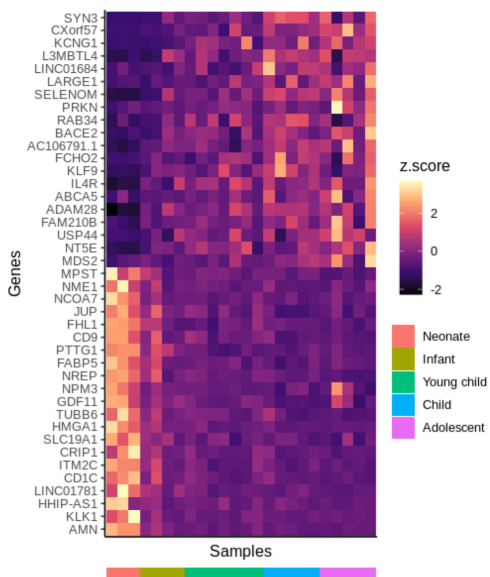

CD14 monocytes

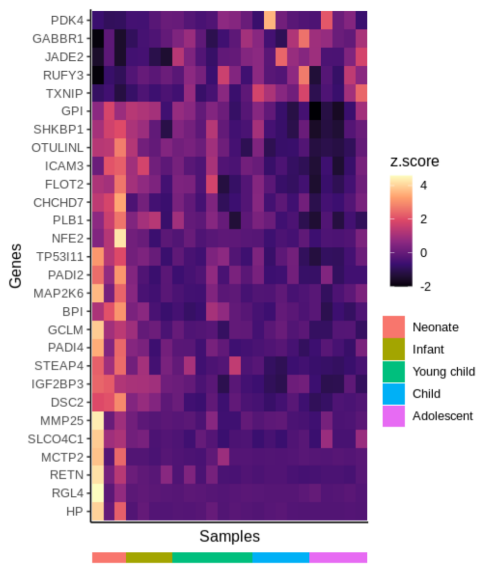



# Extended Data Figure 9

**a**

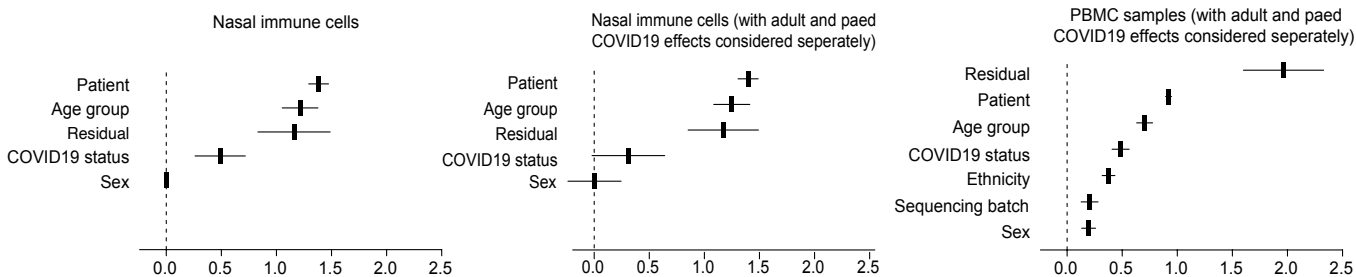

**b**

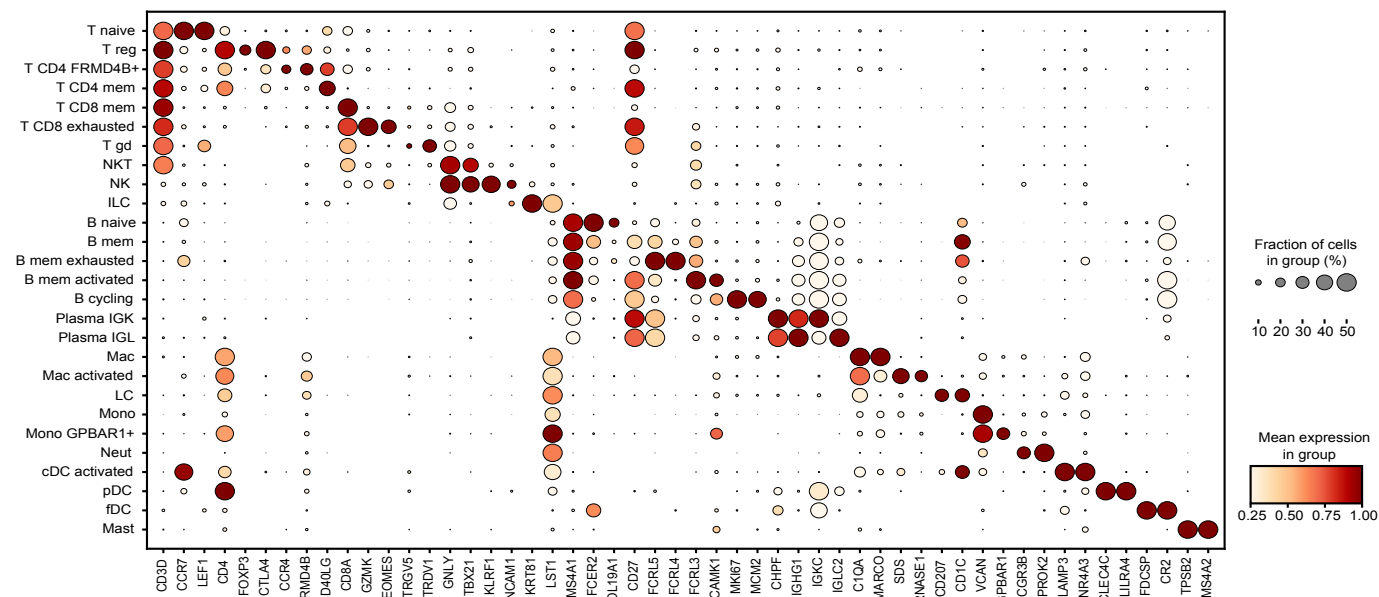

**c**

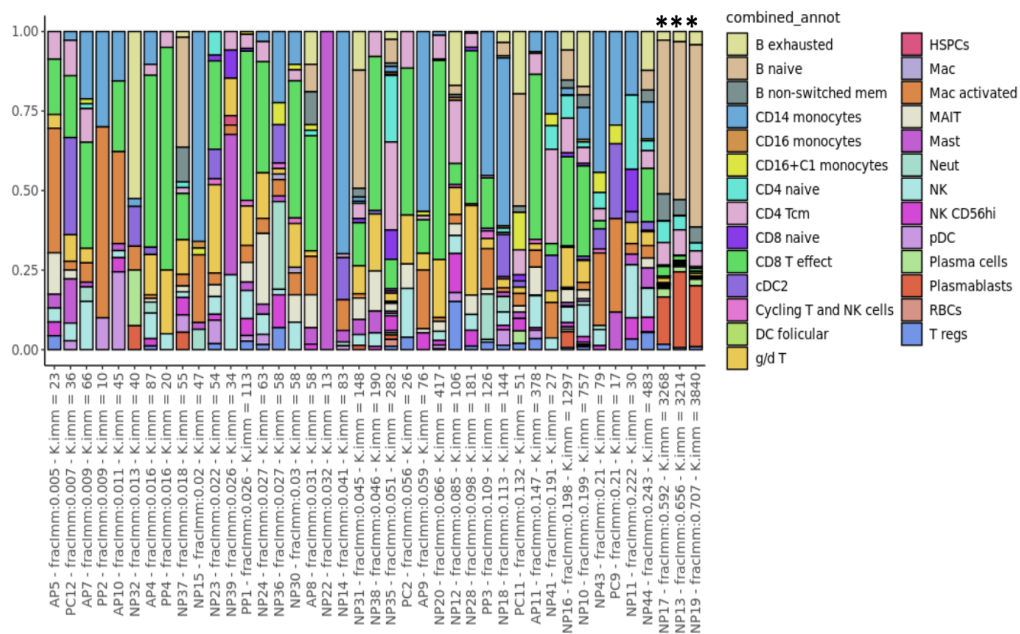

# Extended Data Figure 10

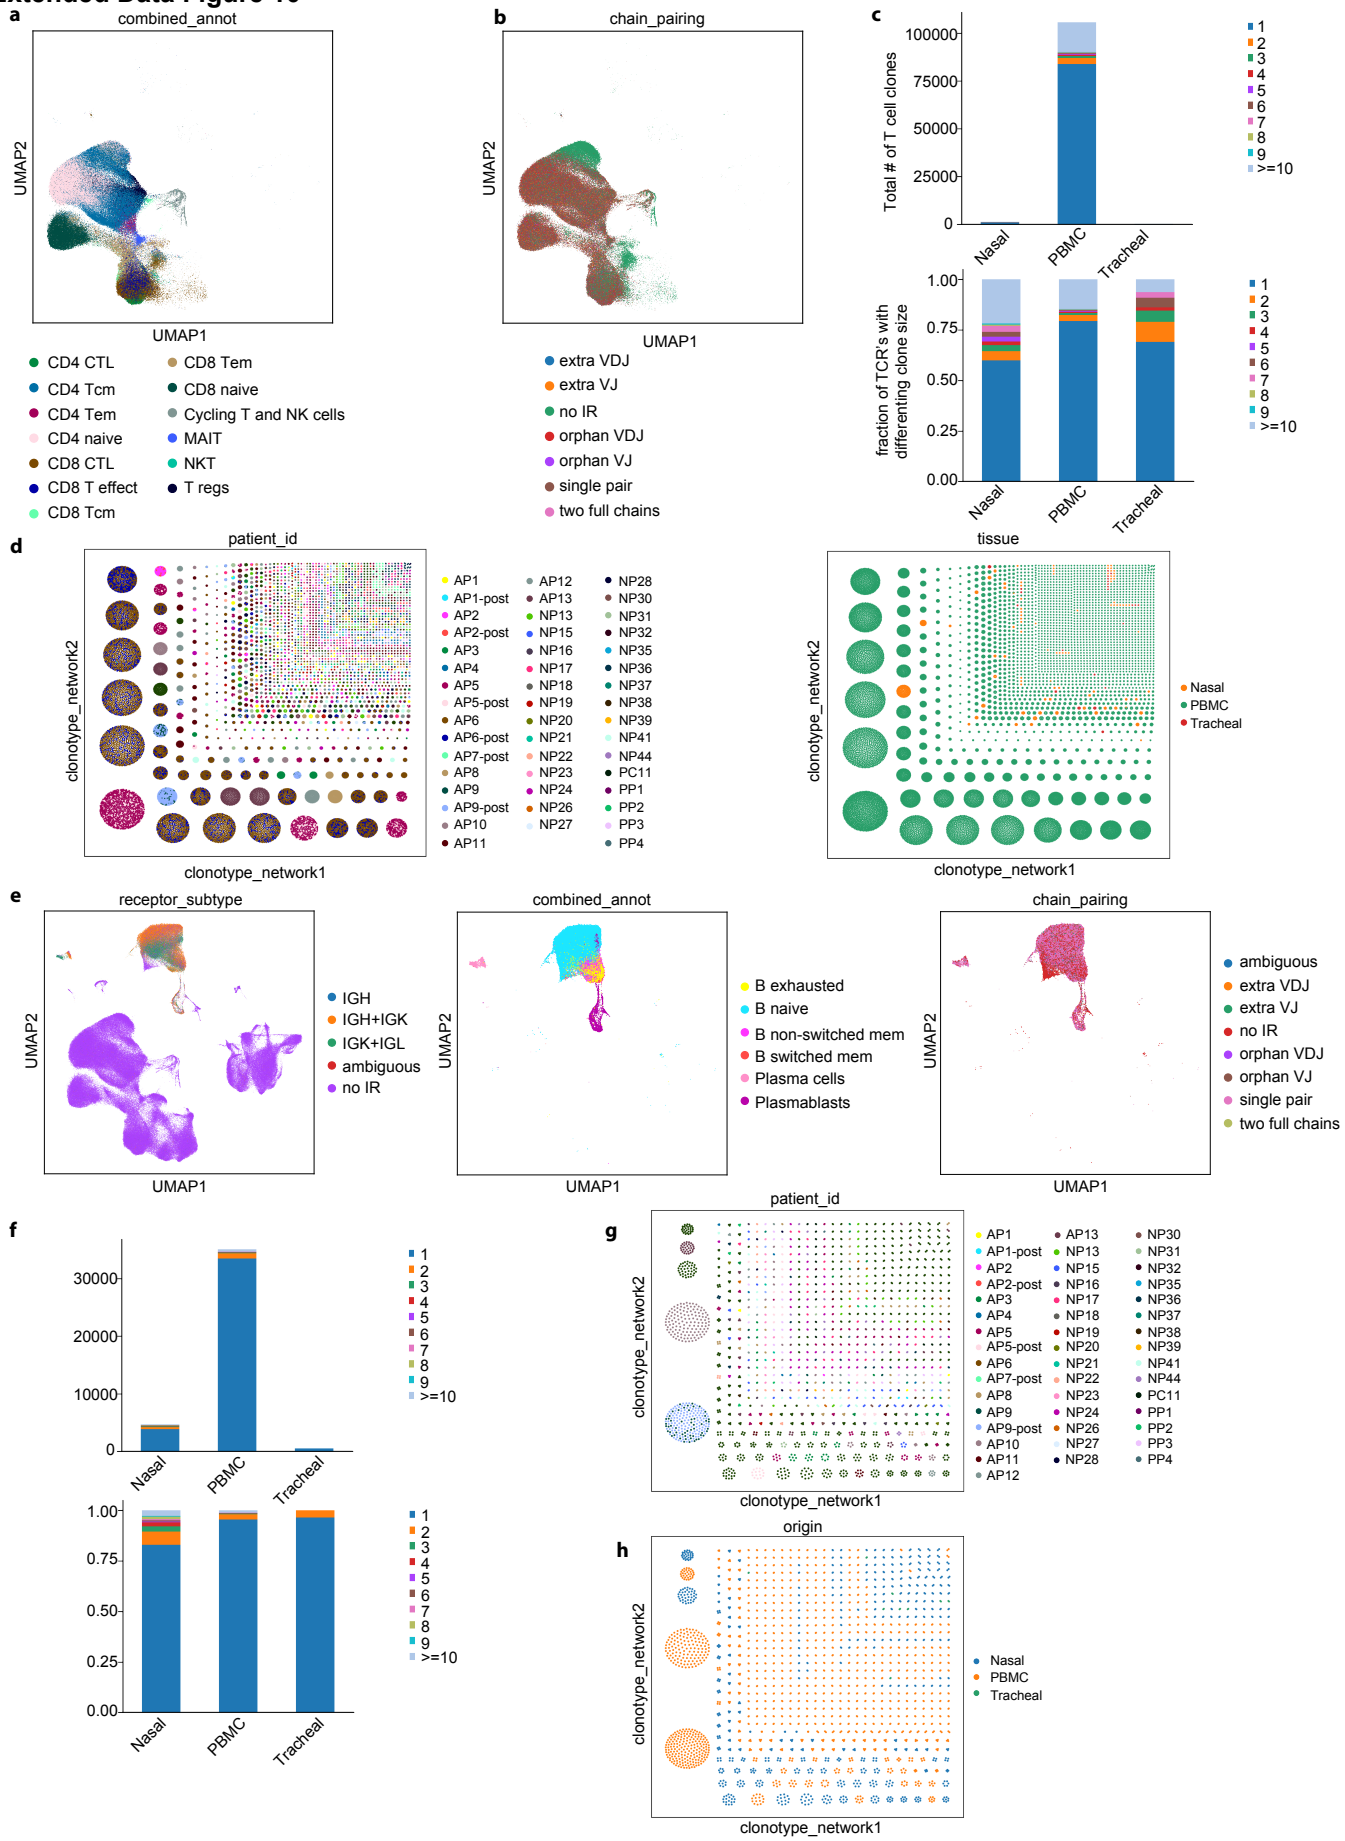

**Extended Data Table 1**

|                                          | <b>SARS-CoV-2 negative children</b><br>(n = 30) | <b>SARS-CoV-2 positive children</b><br>(n = 4) | <b>SARS-CoV-2 positive adults</b><br>(n = 18) | <b>Post-COVID19</b><br>(n = 6) |
|------------------------------------------|-------------------------------------------------|------------------------------------------------|-----------------------------------------------|--------------------------------|
| <b>Median age</b>                        | 2.87 (3days - 16 yrs)                           | 5.83 (21 days - 13 yrs)                        | 66 (25 - 92 yrs)                              | 35 (4 months - 47 yrs)         |
| <b>Sex</b>                               |                                                 |                                                |                                               |                                |
| Male (%)                                 | 13 (43.3)                                       | 3 (75)                                         | 10 (55.6)                                     | 3 (50)                         |
| Female (%)                               | 17 (56.7)                                       | 1 (25)                                         | 8 (44.4)                                      | 3 (50)                         |
| <b>Ethnicity</b>                         |                                                 |                                                |                                               |                                |
| White (%)                                | 20 (66.7)                                       | 3 (75)                                         | 7 (38.8)                                      | 2 (33.3)                       |
| Black (%)                                | 4 (13.3)                                        | 1 (25)                                         | 1 (5.6)                                       | 0 (0)                          |
| Hispanic (%)                             | 0 (0)                                           | 0                                              | 3 (16.7)                                      | 0 (0)                          |
| South Asian (%)                          | 1 (3.3)                                         | 0                                              | 5 (27.7)                                      | 1 (16.7)                       |
| Other (%)                                | 2 (6.7)                                         | 0                                              | 1 (5.6)                                       | 0 (0)                          |
| Unspecified (%)                          | 3 (10)                                          | 0                                              | 1 (5.6)                                       | 3 (50)                         |
| <b>Peripheral blood test at sampling</b> |                                                 |                                                |                                               |                                |
| Lymphocyte count (cells/ $\mu$ l)        | 2,026 $\pm$ 684.6                               | 2,370 $\pm$ 1,830                              | 1,185 $\pm$ 504.1                             | 2,160 $\pm$ 662.6              |
| <b>Viral infection symptoms</b>          |                                                 |                                                |                                               |                                |
| Fever, Fatigue (%)                       | 1 (3.3)                                         | 2 (50)                                         | 13 (72.2)                                     | 3 (50)                         |
| Digestive symptom (%)                    | 2 (6.7)                                         | 3 (75)                                         | 13 (72.2)                                     | 2 (33.3)                       |
| Upper respiratory tract symptom (%)      | 3 (10)                                          | 2 (50)                                         | 9 (50)                                        | 3 (50)                         |
| Respiratory failure (%)                  | 6 (20)                                          | 4 (100)                                        | 12 (66.7)                                     | 6 (100)                        |
| <b>Respiratory Support</b>               |                                                 |                                                |                                               |                                |
| None (%)                                 | -                                               | 0 (0)                                          | 3 (16.7)                                      | 0 (0)                          |
| Low flow oxygen (%)                      | -                                               | 0 (0)                                          | 4 (22.2)                                      | 0 (0)                          |
| HFNC / NIPPV (%)                         | -                                               | 1 (25)                                         | 4 (22.2)                                      | 3 (50)                         |
| IMV (%)                                  | -                                               | 3 (75)                                         | 7 (38.9)                                      | 3 (50)                         |
| <b>COVID-19 severity</b>                 |                                                 |                                                |                                               |                                |
| Asymptomatic (%)                         | NA                                              | 0 (0)                                          | 0 (0)                                         | 0 (0)                          |
| Mild (%)                                 | NA                                              | 0 (0)                                          | 5 (27.8)                                      | 0 (0)                          |
| Moderate (%)                             | NA                                              | 0 (0)                                          | 3 (16.7)                                      | 0 (0)                          |
| Severe (%)                               | NA                                              | 4 (100)                                        | 10 (55.5)                                     | 6 (100)                        |

Abbreviations: HFNC = high flow nasal canula, NIPPV = non-invasive positive pressure ventilation, IMV = invasive mechanical ventilation, NA = not assessed



## Extended Data Table 3

| Virus_id    | Virus name                                            | link                                                                                                                  |
|-------------|-------------------------------------------------------|-----------------------------------------------------------------------------------------------------------------------|
| NC_007605.1 | EBV1 (Human gammaherpesvirus 4)                       | <a href="https://www.ncbi.nlm.nih.gov/nucleotide/82503188">https://www.ncbi.nlm.nih.gov/nucleotide/82503188</a>       |
| NC_009334.1 | EBV2 (Human herpesvirus 4)                            | <a href="https://www.ncbi.nlm.nih.gov/nucleotide/139424470">https://www.ncbi.nlm.nih.gov/nucleotide/139424470</a>     |
| AF156963    | ERVWE1 (syncytin)                                     | <a href="https://www.ncbi.nlm.nih.gov/nucleotide/AF156963">https://www.ncbi.nlm.nih.gov/nucleotide/AF156963</a>       |
| AY101582    | ERVWE1 (syncytin)                                     | <a href="https://www.ncbi.nlm.nih.gov/nucleotide/AY101582">https://www.ncbi.nlm.nih.gov/nucleotide/AY101582</a>       |
| AY101583    | ERVWE1 (syncytin)                                     | <a href="https://www.ncbi.nlm.nih.gov/nucleotide/AY101583">https://www.ncbi.nlm.nih.gov/nucleotide/AY101583</a>       |
| AY101584    | ERVWE1 (syncytin)                                     | <a href="https://www.ncbi.nlm.nih.gov/nucleotide/AY101584">https://www.ncbi.nlm.nih.gov/nucleotide/AY101584</a>       |
| AY101585    | ERVWE1 (syncytin)                                     | <a href="https://www.ncbi.nlm.nih.gov/nucleotide/AY101585">https://www.ncbi.nlm.nih.gov/nucleotide/AY101585</a>       |
| AF072498    | HERV-W                                                | <a href="https://www.ncbi.nlm.nih.gov/nucleotide/AF072498">https://www.ncbi.nlm.nih.gov/nucleotide/AF072498</a>       |
| AF127228    | HERV-W                                                | <a href="https://www.ncbi.nlm.nih.gov/nucleotide/AF127228">https://www.ncbi.nlm.nih.gov/nucleotide/AF127228</a>       |
| AF127229    | HERV-W                                                | <a href="https://www.ncbi.nlm.nih.gov/nucleotide/AF127229">https://www.ncbi.nlm.nih.gov/nucleotide/AF127229</a>       |
| AF331500    | HERV-W                                                | <a href="https://www.ncbi.nlm.nih.gov/nucleotide/AF331500.1/">https://www.ncbi.nlm.nih.gov/nucleotide/AF331500.1/</a> |
| NC_001664.4 | HHV-6A (Human Herpes Virus 6)                         | <a href="https://www.ncbi.nlm.nih.gov/nucleotide/1344462938">https://www.ncbi.nlm.nih.gov/nucleotide/1344462938</a>   |
| NC_000898.1 | HHV-6B (Human Herpes Virus 6)                         | <a href="https://www.ncbi.nlm.nih.gov/nucleotide/9633069">https://www.ncbi.nlm.nih.gov/nucleotide/9633069</a>         |
| NC_001806.2 | Herpes Simplex Virus 1 (Human alphaherpesvirus 1)     | <a href="https://www.ncbi.nlm.nih.gov/nucleotide/820945227">https://www.ncbi.nlm.nih.gov/nucleotide/820945227</a>     |
| NC_001798.2 | Herpes Simplex Virus 2 (Human alphaherpesvirus 1)     | <a href="https://www.ncbi.nlm.nih.gov/nucleotide/820945149">https://www.ncbi.nlm.nih.gov/nucleotide/820945149</a>     |
| NC_001498.1 | Measles morbillivirus                                 | <a href="https://www.ncbi.nlm.nih.gov/nucleotide/9626945">https://www.ncbi.nlm.nih.gov/nucleotide/9626945</a>         |
| NC_002200.1 | Mumps rubulavirus                                     | <a href="https://www.ncbi.nlm.nih.gov/nucleotide/9695415">https://www.ncbi.nlm.nih.gov/nucleotide/9695415</a>         |
| NC_001545.2 | Rubella                                               | <a href="https://www.ncbi.nlm.nih.gov/nucleotide/336284682">https://www.ncbi.nlm.nih.gov/nucleotide/336284682</a>     |
| NC_001348.1 | Varicella Zoster Virus (VZV Human alphaherpesvirus 3) | <a href="https://www.ncbi.nlm.nih.gov/nucleotide/9625875">https://www.ncbi.nlm.nih.gov/nucleotide/9625875</a>         |
| NC_006273.2 | Cytomegalovirus (CMV)                                 | <a href="https://www.ncbi.nlm.nih.gov/nucleotide/155573622">https://www.ncbi.nlm.nih.gov/nucleotide/155573622</a>     |
| NC_045512.2 | SARS-CoV2                                             | <a href="https://www.ncbi.nlm.nih.gov/nucleotide/1798174254">https://www.ncbi.nlm.nih.gov/nucleotide/1798174254</a>   |
